# Supplementary material
Source: bioRxiv or medRxiv preprint supplement (https://www.biorxiv.org/highwire/filestream/79889/field_highwire_adjunct_files/0/260232-1.pdf)
Supplement: Supplementary file [file 260232-1.pdf]

## SUPPLEMENTARY NOTE

### 1. Photochemistry of PA-Nic

**Byproducts from Photolysis of PA-Nic.** Initial LC-MS experiments on the photolysis of compound **6** (PA-Nic) showed that the compound released nicotine (**1**) and two byproducts from the coumarin cage, presumably dialkylcoumarin **13** (~20%) and monoalkylcoumarin **12** (~80%); these same two products were also observed upon photolysis of model compound **10** (Fig. SN1a). As further evidence, we measured the absorption spectrum before and after exhaustive photolysis of PA-Nic (**6**). We observed a 44 nm hypsochromic shift, ( $\lambda_{\text{max}} = 359$  nm, Fig. SN1b), consistent with a monoalkylated coumarin as the major photoproduct. To confirm the identity of these products we compared these products with authentic samples synthesized in our laboratory. Compound **13** was synthesized by alkylation of coumarin **15** followed by deprotection as previously described;<sup>1</sup> compound **12** is a byproduct in this reaction due to incomplete alkylation (Fig. SN1a). Analysis by LC-MS confirmed the identity of **12** and **13** (Fig. SN1c) and the <sup>1</sup>H NMR spectrum of **12** prepared by alkylation of **15** or by photolysis of **10** were identical (Fig. SN1d).

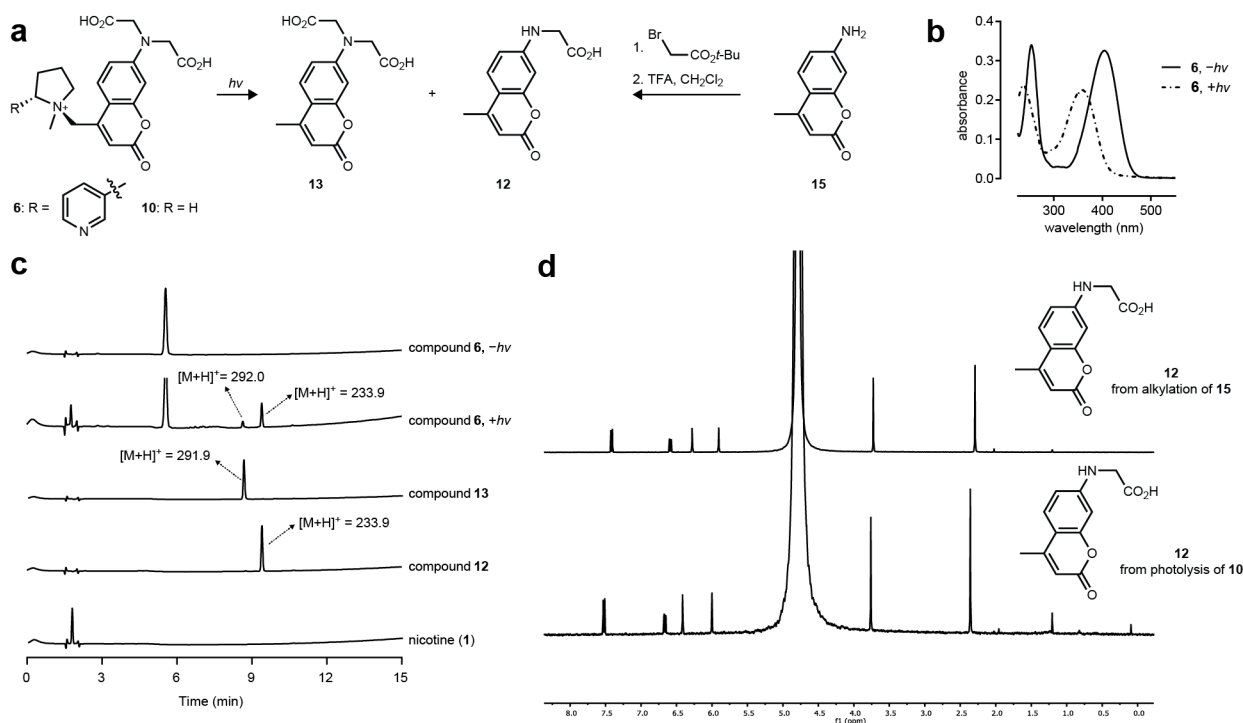

**Fig SN1. Identification of byproducts from PA-Nic photolysis.** (a) Photolysis of PA-Nic (**6**) or model compound **10** results in two coumarin byproducts **12** and **13**. Authentic samples of **12** and **13** could be prepared by alkylation of coumarin **15**. (b) Absorption spectra of PA-Nic (**6**, 20  $\mu\text{M}$ ) in PBS pH 7.4 before and after photolysis (80 s illumination with 405 nm LED light). (c) LC-MS traces of PA-Nic (**6**) before and after 10 sec illumination with 405 nm LED light and authentic samples of released products **12**, **13**, and nicotine (**1**). (d) <sup>1</sup>H-NMR spectra of byproduct **12** prepared by alkylation of **15** (*i.e.*, 'authentic sample'; top) and from purified from photolysis of **10** (bottom).

**Photochemical Reaction Mechanism.** The presence of the 4-methylcoumarin byproducts **12** and **13** suggest a radical cleavage mechanism as previously proposed by Giese and coworkers for coumarin-caged secondary amines.<sup>2</sup> This could occur via two modes (**Fig. SN2**). In Pathway 1, excitation of **6** followed by intramolecular electron abstraction could yield a diradical species. Release of nicotine (**1**), followed by H $\cdot$  migration could yield an iminium species. Attack by water and release of glyoxylic acid, would give coumarin byproduct **12**. In Pathway 2, excitation of **6** followed by intermolecular electron abstraction from solvent could give a radical species. Release of nicotine (**1**), followed by H $\cdot$  abstraction from solvent could yield byproduct **13**. We note that compound **12** could also arise from photobleaching of **13**, although compound **12** is observed throughout the photolysis reaction of **6**.

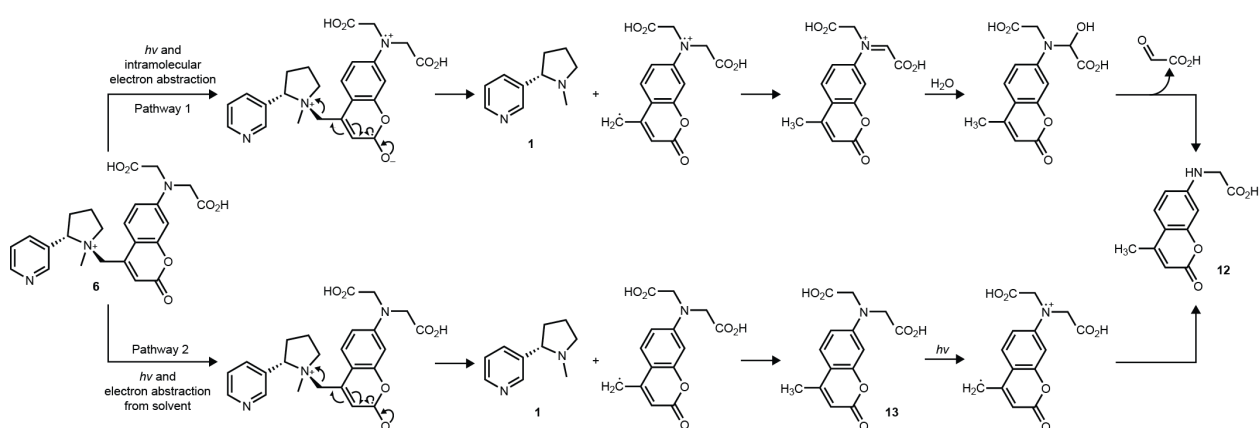

**Figure SN2.** Possible mechanisms of PA-Nic photolysis to yield byproducts **12** and **13**.

## 2. Synthesis and photochemical properties of photoactivatable drugs

**Introduction.** Synthesis of all the photoactivatable (PA) drugs was accomplished using the same general procedure (**Fig. SN3**). Alkylation of the drugs with iminodiacetic acid-substituted coumarin bromide (**5**)<sup>1</sup> afforded the quaternary nitrogen center. The desired PA drug compounds were obtained after deprotection of *tert*-butyl groups with TFA. Alkylation of nicotine (**1**) and fentanyl (**3**) produced two or more isomers, which were separable on HPLC and distinguished by 2D NOESY spectra. Alkylation of nicotine yielded three isomers: two diastereomers (compounds **6** and **19**) and another regioisomer (compound **20**) with the coumarin attached to the pyridine nitrogen. Photochemical quantum yield ( $\Phi_{pc}$ ) of two diastereomers of PA-Nic is similar and an order of magnitude higher than the pyridinium compound **20** (**Table SN1**). Similarly, alkylation of fentanyl (**3**) synthesis gave two diastereomers, compounds **8** and **24**, with compound **8** (PA-Fen) showing a higher  $\Phi_{pc}$  than compound **24**.

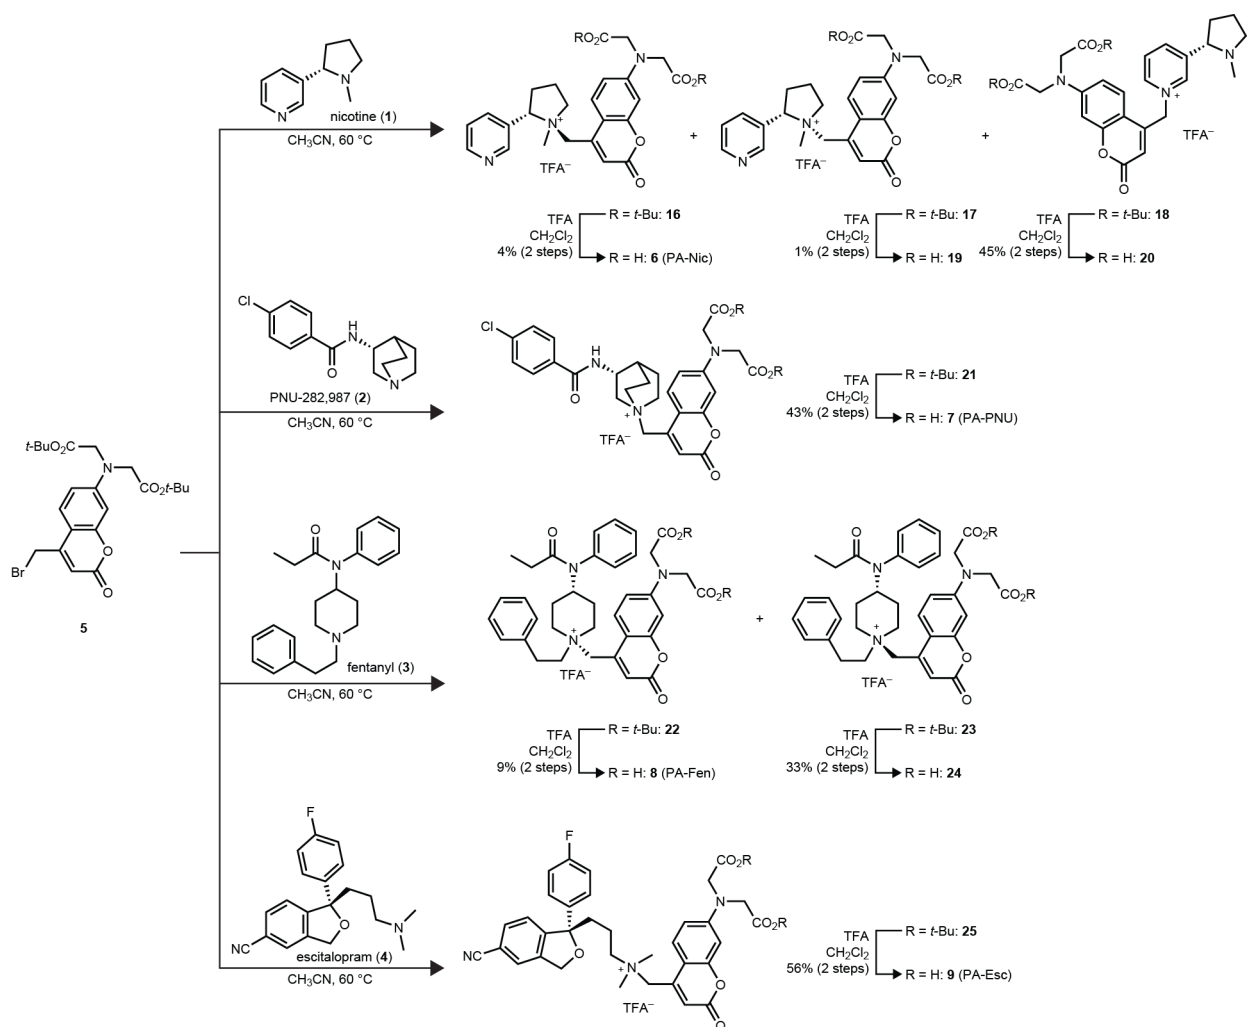

Figure SN3. Synthesis of photoactivatable drugs.

| Compound             | $\lambda_{\text{max}}$ (nm) | $\epsilon$ ( $\text{M}^{-1} \text{cm}^{-1}$ ) | $\Phi_{\text{pc}}$   |
|----------------------|-----------------------------|-----------------------------------------------|----------------------|
| 6 (PA-Nic)           | 404                         | 17400                                         | $7.4 \times 10^{-3}$ |
| 7 (PA-PNU)           | 407                         | 14700                                         | $8.7 \times 10^{-3}$ |
| 8 (PA-Fen)           | 410                         | 14500                                         | $5.5 \times 10^{-3}$ |
| 9 (PA-Esc)           | 406                         | 19600                                         | $5.1 \times 10^{-3}$ |
| 19 (PA-Nic isomer-2) | 404                         | 14300                                         | $7.6 \times 10^{-3}$ |
| 20 (PA-Nic isomer-3) | 388                         | 17200                                         | $0.5 \times 10^{-3}$ |
| 24 (PA-Fen isomer-2) | 407                         | 17500                                         | $3.0 \times 10^{-3}$ |

Table SN1. Spectral and photochemical properties of the photoactivatable drugs in PBS, pH 7.4.

**General Experimental Information.** Commercial reagents were obtained from reputable suppliers and used as received. All solvents were purchased in septum-sealed bottles stored under an inert atmosphere. All reactions were sealed with septa through which an argon atmosphere was introduced unless otherwise noted. Reactions were conducted in round-bottomed flasks containing Teflon-coated magnetic stir bars. Heating of reactions was accomplished with an aluminum reaction block on top of a stirring hotplate equipped with an electronic contact thermometer to maintain the indicated temperatures.

Reactions were monitored by thin layer chromatography (TLC) on precoated TLC glass plates (silica gel 60 F<sub>254</sub> 250  $\mu$ m thickness) or by LC/MS (4.6 mm  $\times$  150 mm 5  $\mu$ m C18 column; 5  $\mu$ L injection; 10–95% CH<sub>3</sub>CN/H<sub>2</sub>O, linear gradient, with constant 0.1% v/v TFA additive; 20 min run; 1 mL/min flow; ESI; positive ion mode; UV detection at 254 nm). TLC chromatograms were visualized by UV illumination or developed with KMnO<sub>4</sub> stain. Flash chromatography was performed on an automated purification system using pre-packed silica gel columns or by preparative HPLC (Phenomenex Gemini NX 30  $\times$  150 mm 5  $\mu$ m C18 column). High-resolution mass spectrometry was performed by the High Resolution Mass Spectrometry Center at the University of Iowa.

NMR spectra were recorded on a 400 MHz spectrometer. <sup>1</sup>H and <sup>13</sup>C chemical shifts ( $\delta$ ) were referenced to TMS or residual solvent peaks. Data for <sup>1</sup>H NMR spectra are reported as follows: chemical shift ( $\delta$  ppm), multiplicity (s = singlet, d = doublet, t = triplet, q = quartet, dd = doublet of doublets, m = multiplet), coupling constant (Hz), integration. Data for <sup>13</sup>C NMR spectra are reported by chemical shift ( $\delta$  ppm) with hydrogen multiplicity (C, CH, CH<sub>2</sub>, CH<sub>3</sub>) information obtained from DEPT spectra.

**General procedure for the reaction of drugs with coumarin-bromide:** The following procedure for di-*tert*-butyl PA-Nic isomers (**16–18**) are representative. Nicotine **1** (303 mg, 1.87 mmol) was dissolved in 40 mL anhydrous CH<sub>3</sub>CN. Coumarin bromide **5**<sup>1</sup> (900 mg, 1.87 mmol) was added and the reaction was heated to 60 °C and stirred for 18 h. The reaction was cooled to room temperature and concentrated *in vacuo*. Purification by HPLC (5–50% v/v MeCN in H<sub>2</sub>O, linear gradient, constant 0.1% v/v TFA additive) and lyophilization afforded the desired product as pale yellow powder. Compounds **16** and **17** are diastereomers and eluted as a single peak, inseparable at this step; obtained 82 mg (6%) as a 3:1 diastereomeric mixture. Both isomers were distinguished by 2D NOESY spectra. The regioisomer **18** (820 mg, 56%) is easily separable by HPLC and distinguished <sup>1</sup>H NMR.

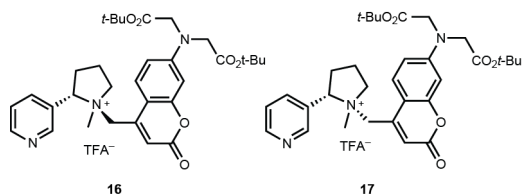

**Compounds 16 and 17 (3:1 mixture).**  $^1\text{H}$  NMR ( $\text{CD}_3\text{OD}$ , 400 MHz)  $\delta$  8.95 (s, 1H), 8.83 (s, 1H), 8.31 (d,  $J = 8.1$  Hz, 1H), 7.72 (dd,  $J = 7.9, 4.9$  Hz, 1H), 7.64 (d,  $J = 9.1$  Hz, 0.7H), 7.52 (d,  $J = 9.1$  Hz, 0.3H), 6.66 (dd,  $J = 9.1, 2.6$  Hz, 1H), 6.52 (d,  $J = 2.6$  Hz, 1H), 6.39 (s, 0.7H), 6.36 (s, 0.3H) 5.28 – 5.20 (m, 1H), 4.41 (d,  $J = 13.1$  Hz, 0.3H), 4.34 (d,  $J = 13.1$  Hz, 0.7H), 4.19 (s, 4H), 4.02 (d,  $J = 13.2$  Hz, 0.3H), 3.97 – 3.89 (m, 1H), 3.66 – 3.56 (m, 1H), 3.19 (s, 0.7H), 2.91 (s, 2.3H), 2.83 – 2.63 (m, 2H), 2.48 – 2.23 (m, 2H), 1.48 (s, 18H);  $^{13}\text{C}$  NMR ( $\text{CD}_3\text{OD}$ , 101 MHz)  $\delta$  170.7 (C), 162.0 (C), 161.9 (C), 157.5 (C), 157.3 (C), 153.6 (C), 152.6 (C), 143.9 (C), 143.7 (C), 141.2 (CH), 141.0 (CH), 127.1 (CH), 126.6 (CH), 118.2 (CH), 117.9 (CH), 111.0 (CH), 110.6 (C), 110.3 (C), 100.3 (CH), 83.4 (CH), 81.3 (CH), 79.8 (CH), 65.4 ( $\text{CH}_2$ ), 63.3 ( $\text{CH}_2$ ), 61.2 ( $\text{CH}_2$ ), 55.6 ( $\text{CH}_2$ ), 55.1 ( $\text{CH}_2$ ), 50.3 ( $\text{CH}_3$ ) 49.9 ( $\text{CH}_3$ ), 42.9 ( $\text{CH}_3$ ) 28.3 ( $\text{CH}_3$ ), 27.4 ( $\text{CH}_2$ ), 26.7 ( $\text{CH}_2$ ), 20.8 ( $\text{CH}_2$ ), 20.2 ( $\text{CH}_2$ ). HRMS (ESI) calcd for  $\text{C}_{32}\text{H}_{42}\text{N}_3\text{O}_6$   $[\text{M}]^+$  564.3068, found 564.3074.

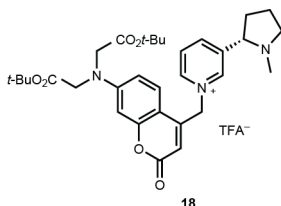

**Compound 18.**  $^1\text{H}$  NMR ( $\text{CD}_3\text{OD}$ , 400 MHz)  $\delta$  9.45 (s, 1H), 9.22 (d,  $J = 6.2$  Hz, 1H), 8.98 (d,  $J = 8.3$  Hz, 1H), 8.35 (dd,  $J = 8.2, 6.2$  Hz, 1H), 7.62 (d,  $J = 9.0$  Hz, 1H), 6.69 (dd,  $J = 9.0, 2.7$  Hz, 1H), 6.53 (d,  $J = 2.6$  Hz, 1H), 6.19 (s, 2H), 5.63 (s, 1H), 4.75 (dd,  $J = 9.4, 8.4$  Hz, 1H), 4.20 (s, 4H), 3.98 – 3.92 (m, 1H), 3.44 – 3.37 (m, 1H), 2.89 (s, 3H), 2.76 – 2.67 (m, 1H), 2.54 – 2.44 (m, 1H), 2.39 – 2.31 (m, 2H), 1.48 (s, 18H);  $^{13}\text{C}$  NMR ( $\text{CD}_3\text{OD}$ , 101 MHz)  $\delta$  170.7 (C), 162.4 (C), 156.9 (C), 153.7 (C), 149.4 (C), 148.6 (CH), 148.2 (CH), 148.1 (CH), 136.6 (C), 130.5 (CH), 125.9 (CH), 111.1 (CH), 109.9 (CH), 108.6 (CH), 100.0 (CH), 83.4 (C), 69.5 (C), 61.7 ( $\text{CH}_2$ ), 57.8 ( $\text{CH}_2$ ), 55.2 ( $\text{CH}_2$ ), 39.6 (CH), 32.0 ( $\text{CH}_2$ ), 28.3 ( $\text{CH}_3$ ), 23.0 ( $\text{CH}_2$ ). HRMS (ESI) calcd for  $\text{C}_{32}\text{H}_{42}\text{N}_3\text{O}_6$   $[\text{M}]^+$  564.3068, found 564.3072.

**General procedure for deprotection of *tert*-butyl groups:** The following procedure for PA-Nic (6) is representative. To deprotect the *tert*-butyl ester group, a mixture of diastereomers 16 and 17 (52 mg, 0.066 mmol) was dissolved in  $\text{CH}_2\text{Cl}_2$  (2.5 mL). Trifluoroacetic acid (TFA; 0.5 mL) was added and the

reaction was stirred at ambient temperature for 2 h. The reaction mixture was concentrated *in vacuo* and purified by reverse phase HPLC (3% v/v CH<sub>3</sub>CN in H<sub>2</sub>O, isocratic gradient, constant 0.1% v/v TFA additive). Obtained 26 mg (59%) of PA-Nic (**6**; *S,S*-isomer) and 8 mg (18%) of compound **19** (*S,R*-isomer) as pale yellow powders. The two diastereomers were distinguished by 2D NOESY spectra.

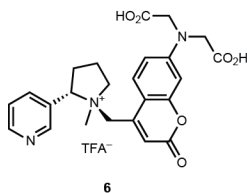

**Compound 6 (PA-Nic).** <sup>1</sup>H NMR (CD<sub>3</sub>OD, 400 MHz) δ 8.96 (s, 1H), 8.83 (s, 1H), 8.32 (d, *J* = 7.9 Hz, 1H), 7.73 (s, 1H), 7.63 (d, *J* = 9.1 Hz, 1H), 6.69 (dd, *J* = 9.1, 2.5 Hz, 1H), 6.56 (d, *J* = 2.5 Hz, 1H), 6.38 (s, 1H), 5.27 (dd, *J* = 11.3, 8.4 Hz, 1H), 4.85 (d, *J* = 13.2 Hz, 1H), 4.32 (d, *J* = 13.2 Hz, 1H), 4.30 (s, 4H), 3.98 – 3.88 (m, 1H), 3.64 – 3.59 (m, 1H), 2.90 (s, 3H), 2.83 – 2.62 (m, 2H), 2.44 – 2.23 (m, 2H). <sup>13</sup>C NMR (CD<sub>3</sub>OD, 101 MHz) δ 172.1 (C), 160.6 (C), 156.1 (C), 152.1 (C), 151.4 (CH), 142.4 (C), 139.8 (CH), 125.7 (CH), 116.5 (CH), 109.6 (CH), 108.9 (C), 98.9 (CH), 78.3 (CH), 63.9 (CH<sub>2</sub>), 59.7 (CH<sub>2</sub>), 52.7 (CH<sub>2</sub>), 41.5 (CH<sub>3</sub>), 25.2 (CH<sub>2</sub>), 18.8 (CH<sub>2</sub>). HRMS (ESI) calcd for C<sub>26</sub>H<sub>42</sub>N<sub>3</sub>O<sub>6</sub> [M]<sup>+</sup> 452.1816, found 452.1841.

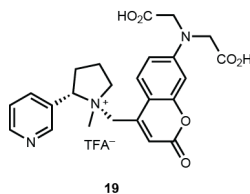

**Compound 19.** <sup>1</sup>H NMR (CD<sub>3</sub>OD, 400 MHz) δ 8.94 (s, 1H), 8.83 (s, 1H), 8.30 (d, *J* = 7.9 Hz, 1H), 7.72 (dd, *J* = 7.7, 4.7 Hz, 1H), 7.49 (d, *J* = 9.1 Hz, 1H), 6.69 (dd, *J* = 9.1, 2.5 Hz, 1H), 6.56 (d, *J* = 2.5 Hz, 1H), 6.36 (s, 1H), 5.23 (dd, *J* = 9.7, 8.1 Hz, 1H), 4.41 (d, *J* = 13.2 Hz, 1H), 4.29 (s, 4H), 4.02 (d, *J* = 13.2 Hz, 1H), 3.97 – 3.90 (m, 1H), 3.63 – 3.56 (m, 1H), 3.19 (s, 3H), 3.02 – 2.90 (m, 1H), 2.80 – 2.71 (m, 1H), 2.61 – 2.40 (m, 2H). <sup>13</sup>C NMR (CD<sub>3</sub>OD, 101 MHz) δ 172.1 (C), 160.5 (C), 155.9 (C), 152.2 (C), 151.4 (CH), 151.3 (CH), 142.3 (C), 139.5 (CH), 125.1 (CH), 116.9 (CH), 109.6 (CH), 109.2 (C), 100.0 (C), 98.9 (CH), 79.9 (CH), 61.9 (CH<sub>2</sub>), 54.1 (CH<sub>2</sub>), 52.7 (CH<sub>2</sub>), 48.9 (CH<sub>3</sub>), 26.0 (CH<sub>2</sub>), 19.4 (CH<sub>2</sub>). HRMS (ESI) calcd for C<sub>26</sub>H<sub>42</sub>N<sub>3</sub>O<sub>6</sub> [M]<sup>+</sup> 452.1816, found 452.1829.

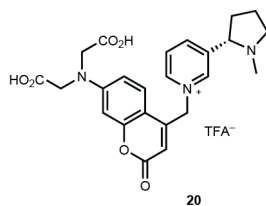

**Compound 20:** This compound was prepared from **18** according to the general procedure described above for compound **6**. Method for reverse phase HPLC: 05–40% MeCN/H<sub>2</sub>O, linear gradient, with constant 0.1% v/v TFA additive. Yield: 80%, pale yellow powder. <sup>1</sup>H NMR (D<sub>2</sub>O, 400 MHz) δ 9.25 (s, 1H), 9.16 (d, *J* = 6.1 Hz, 1H), 8.94 (d, *J* = 8.2 Hz, 1H), 8.37 (dd, *J* = 8.2, 6.2 Hz, 1H), 7.53 (d, *J* = 9.0 Hz, 1H), 6.72 (dd, *J* = 9.0, 2.2 Hz, 1H), 6.64 (d, *J* = 2.3 Hz, 1H), 6.18 (s, 2H), 5.72 (s, 1H), 4.35 (s, 4H), 3.95 (brs, 1H), 3.44 (brs, 1H), 2.86 (s, 3H), 2.78 – 2.69 (m, 1H), 2.48 – 2.31 (m, 3H). <sup>13</sup>C NMR (CD<sub>3</sub>OD, 101 MHz) δ 173.9 (C), 162.4 (C), 156.9 (C), 153.5 (C), 149.2 (C), 148.6 (CH) 148.0 (CH), 147.9 (CH), 137.0 (C), 130.5 (CH), 126.0 (CH), 111.0 (CH), 110.1 (CH), 108.5 (C), 99.9 (CH), 69.4 (CH), 61.6 (CH<sub>2</sub>), 57.7 (CH<sub>2</sub>), 54.5 (CH<sub>2</sub>), 39.6 (CH<sub>3</sub>), 32.1 (CH<sub>2</sub>), 23.0 (CH<sub>2</sub>). HRMS (ESI) calcd for C<sub>26</sub>H<sub>42</sub>N<sub>3</sub>O<sub>6</sub> [M]<sup>+</sup> 452.1816, found 452.1827.

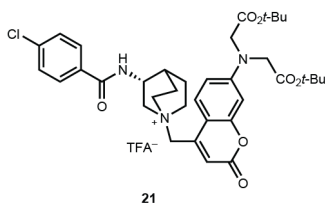

**Di-tert-butyl PA-PNU (21):** This compound was prepared according to the general procedure described above for compounds **16–18**. Method for reverse phase HPLC: 05–95% MeCN/H<sub>2</sub>O, linear gradient, with constant 0.1% v/v TFA additive. Yield: quantitative, pale yellow powder. <sup>1</sup>H NMR (CD<sub>3</sub>CN, 400 MHz) δ 7.84 (d, *J* = 8.0 Hz, 2H), 7.64 (d, *J* = 8.8 Hz, 1H), 7.55 (s, 1H), 7.47 (d, *J* = 7.8 Hz, 2H), 6.68 – 6.59 (m, 1H), 6.52 (d, *J* = 2.4 Hz, 1H), 6.29 (s, 2H), 4.40 (s, 3H), 4.10 (s, 4H), 3.95 (t, *J* = 10.2 Hz, 1H), 3.54 (d, *J* = 36.4 Hz, 5H), 2.35 (s, 1H), 2.24 (brs, 1H), 2.05 (brs, 2H), 1.90 (brs, 1H), 1.45 (s, 18H). <sup>13</sup>C NMR (CD<sub>3</sub>OD, 101 MHz) δ 170.7 (C), 169.5 (C), 162.0 (C), 157.4 (C), 153.6 (C), 142.7 (C), 139.1 (C), 133.5 (C), 130.3 (CH), 129.7 (CH), 127.5 (CH), 118.5 (CH), 111.2 (C), 110.7 (CH), 100.2 (CH), 83.4 (C), 62.9 (CH<sub>2</sub>), 62.0 (CH<sub>2</sub>), 56.8 (CH<sub>2</sub>), 56.6 (CH<sub>2</sub>), 55.1 (CH<sub>2</sub>), 47.7 (CH), 30.7 (C), 28.3 (CH<sub>3</sub>), 25.6 (CH), 23.9 (CH<sub>2</sub>), 23.7 (C), 20.0 (CH<sub>2</sub>). HRMS (ESI) calcd for C<sub>36</sub>H<sub>45</sub>ClN<sub>3</sub>O<sub>7</sub> [M]<sup>+</sup> 666.2941, found 666.2953.

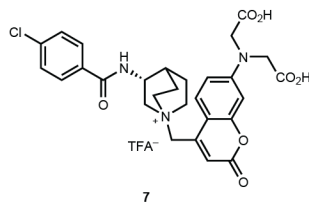

**PA-PNU (7):** This compound was prepared from **21** according to the general procedure described above for the compound **6**. Method for reverse phase HPLC: 05–30% MeCN/H<sub>2</sub>O, linear gradient, with constant 0.1% v/v TFA additive. Yield: 43%, pale yellow powder. <sup>1</sup>H NMR (CD<sub>3</sub>OD, 400 MHz) δ 7.81 (d, *J* = 8.6 Hz, 2H), 7.76 (d, *J* = 9.0 Hz, 1H), 7.47 (d, *J* = 8.6 Hz, 2H), 6.73 (d, *J* = 8.7 Hz, 1H), 6.58 – 6.53 (m, 1H), 6.37 (s, 1H), 4.58 (s, 2H), 4.47 – 4.41 (m, 1H), 4.30 (s, 4H), 4.11 (t, *J* = 11.3 Hz, 1H), 3.63 (t, *J* = 7.9 Hz, 4H), 3.65 – 3.51 (m, 5H), 2.38 – 2.00 (m, 5H). <sup>13</sup>C NMR (CD<sub>3</sub>OD, 101 MHz) δ 173.5 (C), 169.7 (C), 162.0 (C), 157.5 (C), 153.6 (C), 142.6 (C), 139.2 (C), 133.5 (C), 130.3 (CH), 129.8 (CH), 127.3 (CH), 118.5 (CH), 111.1 (CH), 110.7 (CH), 100.2 (C), 62.9 (CH<sub>2</sub>), 62.3 (CH<sub>2</sub>), 56.7 (CH<sub>2</sub>), 54.2 (CH<sub>2</sub>), 47.8 (CH), 25.5 (CH), 23.9 (CH<sub>2</sub>), 20.0 (CH<sub>2</sub>). HRMS (ESI) calcd for C<sub>36</sub>H<sub>45</sub>ClN<sub>3</sub>O<sub>7</sub> [M]<sup>+</sup> 554.1689, found 554.1693.

**Di-*tert*-butyl PA-Fen isomers (22 and 23):** These compounds were prepared from compound **3** according to the general procedure described above for compounds **16–18**. Method for reverse phase HPLC: 40–95% MeCN/H<sub>2</sub>O, linear gradient, with constant 0.1% v/v TFA additive. Yield: 55% (22% of minor isomer (**22**) and 78% of major isomer (**23**)), pale yellow powders. Isomers distinguished by 2D NOESY spectra.

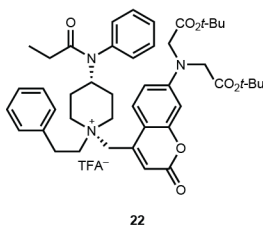

**Di-*tert*-butyl PA-Fen minor isomer (22):** <sup>1</sup>H NMR (CD<sub>3</sub>OD, 400 MHz) δ 7.69 (d, *J* = 9.0 Hz, 1H), 7.52 – 7.48 (m, 3H), 7.32 – 7.20 (m, 5H), 7.10 – 7.07 (m, 2H), 6.58 (dd, *J* = 9.0, 2.7 Hz, 1H), 6.54 (d, *J* = 2.6 Hz, 1H), 6.26 (s, 1H), 4.71 (s, 2H), 4.69 – 4.62 (m, 1H), 4.21 (s, 4H), 3.72 (brs, 4H), 3.61 – 3.56 (m, 2H), 3.15 – 3.11 (m, 2H), 2.47 – 2.22 (m, 4H), 2.00 (q, *J* = 7.5 Hz, 2H), 1.48 (s, 18H), 1.00 (t, *J* = 7.5 Hz, 3H). <sup>13</sup>C NMR (CD<sub>3</sub>OD, 101 MHz) δ 176.4 (C), 170.6 (C), 161.7 (C), 157.3 (C), 153.7 (C), 143.4 (C), 140.8 (C), 136.4 (C), 131.3 (CH), 130.8 (CH), 130.4 (CH), 130.1 (CH), 129.9 (CH), 128.5 (CH), 126.9 (CH)



117.3 (CH), 111.0 (CH), 110.4 (CH), 100.4 (C), 83.4 (C), 66.1 (CH<sub>2</sub>), 59.2 (CH<sub>2</sub>), 55.8 (CH<sub>2</sub>), 55.2 (CH<sub>2</sub>), 51.2 (CH), 29.6 (CH<sub>2</sub>), 29.5 (CH<sub>2</sub>), 28.3 (CH), 25.4 (CH<sub>2</sub>), 9.8 (CH). HRMS (ESI) calcd for C<sub>44</sub>H<sub>56</sub>N<sub>3</sub>O<sub>7</sub> [M]<sup>+</sup> 738.4113, found 738.4132.

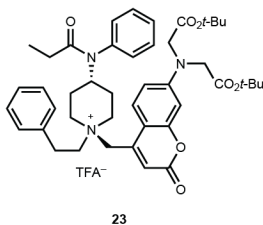

**Di-tert-butyl PA-Fen major isomer (23):** <sup>1</sup>H NMR (CD<sub>3</sub>OD, 400 MHz) δ 7.84 (d, *J* = 9.1 Hz, 1H), 7.56 – 7.49 (m, 3H), 7.35 – 7.25 (m, 5H), 7.14 – 7.08 (m, 2H), 6.71 (dd, *J* = 9.1, 2.6 Hz, 1H), 6.55 (d, *J* = 2.6 Hz, 1H), 6.45 (s, 1H), 4.80 (s, 2H), 4.53 (dt, *J* = 11.9, 6.3 Hz, 1H), 4.21 (s, 4H), 3.72 – 3.54 (m, 6H), 3.16 – 3.12 (m, 2H), 2.18 – 2.02 (m, 4H), 1.98 (q, *J* = 7.5 Hz, 2H), 1.48 (s, 18H), 0.97 (t, *J* = 7.5 Hz, 3H). <sup>13</sup>C NMR (CD<sub>3</sub>OD, 101 MHz) δ 176.3 (C), 170.7 (C), 161.9 (C), 157.4 (C), 153.6 (C), 142.7 (C), 140.5 (C), 136.5 (C), 131.2 (CH), 130.7 (CH), 130.3 (CH), 130.2 (CH), 129.9 (CH), 128.6 (CH), 127.2 (CH), 119.0 (CH), 111.1 (CH), 100.9 (C), 100.3 (CH), 83.5 (C), 62.1 (CH<sub>2</sub>), 59.1 (CH<sub>2</sub>), 58.6 (CH<sub>2</sub>), 55.1 (CH<sub>2</sub>), 51.6 (CH), 29.5 (CH<sub>2</sub>), 28.9 (CH<sub>2</sub>), 28.3 (CH<sub>3</sub>), 24.8 (CH<sub>2</sub>), 9.8 (CH). HRMS (ESI) calcd for C<sub>44</sub>H<sub>56</sub>N<sub>3</sub>O<sub>7</sub> [M]<sup>+</sup> 738.4113, found 738.4121.

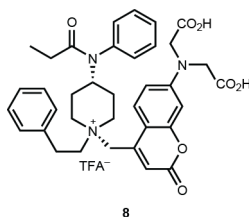

**PA-Fen (8):** This compound was prepared from **22** according to the general procedure described above for compound **6**. Method for reverse phase HPLC: 05–95% MeCN/H<sub>2</sub>O, linear gradient, with constant 0.1% v/v TFA additive. Yield: 79%, pale yellow powder. <sup>1</sup>H NMR (CD<sub>3</sub>OD, 400 MHz) δ 7.59 (d, *J* = 8.7 Hz, 1H), 7.55 – 7.41 (m, 3H), 7.34 – 7.25 (m, 4H), 7.27 – 7.20 (m, 1H), 7.15 – 7.06 (m, 2H), 6.59 – 6.57 (m, 2H), 6.25 (s, 1H), 4.75 – 4.71 (m, 1H), 4.69 (s, 2H), 4.30 (s, 4H), 3.73 – 3.65 (m, 4H), 3.63 – 3.58 (m, 2H), 3.16 – 3.12 (m, 2H), 2.32 – 2.23 (m, 4H), 2.01 – 1.96 (m, 2H), 1.00 (t, *J* = 7.4 Hz, 3H). <sup>13</sup>C NMR (CD<sub>3</sub>OD, 101 MHz) δ 176.4 (C), 174.3 (C), 161.7 (C), 159.9 (C), 157.3 (C), 153.4 (C), 143.4 (C), 140.5 (C), 136.3 (C), 131.3 (CH), 130.9 (CH), 130.5 (CH), 130.1 (CH), 129.9 (CH), 128.5 (CH), 126.9 (CH), 117.3 (CH), 111.0 (CH), 100.4 (CH), 66.3 (C), 66.1 (CH<sub>2</sub>), 59.3 (CH<sub>2</sub>), 55.7 (CH<sub>2</sub>), 55.1 (CH<sub>2</sub>), 51.2 (CH), 29.6 (CH<sub>2</sub>), 29.4 (CH<sub>2</sub>), 25.5 (CH<sub>2</sub>), 9.8 (CH). HRMS (ESI) calcd for C<sub>36</sub>H<sub>40</sub>N<sub>3</sub>O<sub>7</sub> [M]<sup>+</sup> 626.2861, found 626.2865.

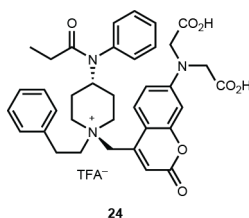

**PA-Fen isomer-2 (24):** This compound was prepared from **23** according to the general procedure described above for compound **6**. Method for reverse phase HPLC: 05–95% MeCN/H<sub>2</sub>O, linear gradient, with constant 0.1% v/v TFA additive. Yield: 77 %, pale yellow powder. <sup>1</sup>H NMR (CD<sub>3</sub>OD, 400 MHz) δ 7.81 (d, *J* = 9.1 Hz, 1H), 7.55 – 7.49 (m, 3H), 7.36 – 7.25 (m, 5H), 7.12 (d, *J* = 7.3 Hz, 2H), 6.75 (dd, *J* = 9.1, 2.6 Hz, 1H), 6.60 (d, *J* = 2.6 Hz, 1H), 6.45 (s, 1H), 4.79 (s, 2H), 4.57 – 4.48 (m, 1H), 4.31 (s, 4H), 3.70 – 3.53 (m, 6H), 3.16 – 3.11 (m, 2H), 2.15 – 1.96 (m, 6H), 0.97 (t, *J* = 7.4 Hz, 3H). <sup>13</sup>C NMR (CD<sub>3</sub>OD, 101 MHz) δ 176.3 (C), 173.6 (C), 161.9 (C), 157.4 (C), 153.6 (C), 142.6 (C), 140.5 (C), 136.5 (C), 131.2 (CH), 130.7 (CH), 130.3 (CH), 129.9 (CH), 128.6 (CH), 127.2 (CH), 119.0 (CH), 111.1 (CH), 110.9, 100.3 (CH), 62.1 (CH<sub>2</sub>), 59.1 (CH<sub>2</sub>), 58.6 (CH<sub>2</sub>), 54.2 (CH<sub>2</sub>), 51.6 (CH), 29.5 (CH<sub>2</sub>), 28.9 (CH<sub>2</sub>), 24.8 (CH<sub>2</sub>), 9.8 (CH). HRMS (ESI) calcd for C<sub>36</sub>H<sub>40</sub>N<sub>3</sub>O<sub>7</sub> [M]<sup>+</sup> 626.2861, found 626.2863.

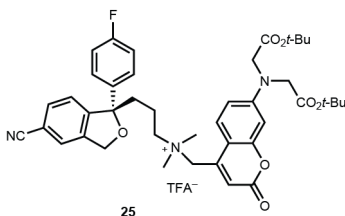

**Di-tert-butyl PA-Esc (25):** This compound was prepared from compound **4** according to the general procedure described above for compounds **16–18**. Method for reverse phase HPLC: 40–55% MeCN/H<sub>2</sub>O, linear gradient, with constant 0.1% v/v TFA additive. Yield: 70%, pale yellow powder. <sup>1</sup>H NMR (CD<sub>3</sub>OD, 400 MHz) δ 7.81 (d, *J* = 9.1 Hz, 1H), 7.68 (d, *J* = 8.8 Hz, 1H), 7.67 (s, 1H) 7.61 (dd, *J* = 7.7, 0.9 Hz, 1H), 7.59 – 7.49 (m, 2H), 7.13 – 7.02 (m, 2H), 6.70 (dd, *J* = 9.1, 2.7 Hz, 1H), 6.54 (d, *J* = 2.5 Hz, 1H), 6.35 (s, 1H), 5.25 – 5.06 (m, 2H), 4.70 – 4.55 (m, 2H), 4.22 (s, 4H), 3.61 – 3.38 (m, 2H), 3.09 (s, 3H), 3.05 (s, 3H), 2.42 – 2.29 (m, 1H), 2.21 – 2.06 (m, 1H), 1.95 – 1.69 (m, 2H), 1.48 (s, 19H). <sup>13</sup>C NMR (CD<sub>3</sub>OD, 101 MHz) δ 170.7 (C), 162.0 (C), 157.4 (C), 153.6 (C), 150.2 (C), 143.3 (C), 141.7 (C), 140.4 (2C), 133.2 (CH), 128.2 (CH), 128.1 (CH), 127.3 (CH), 126.8 (CH), 124.1 (CH), 119.5 (C), 118.2 (CH), 116.5 (CH), 116.3 (CH), 113.1 (C), 111.0 (CH), 110.6 (C), 100.3 (CH), 91.8 (C), 83.4 (C), 72.4 (CH<sub>2</sub>), 66.6 (CH<sub>2</sub>), 63.2 (CH<sub>2</sub>), 55.1 (CH<sub>2</sub>), 51.5 (CH<sub>3</sub>), 51.3 (CH<sub>3</sub>), 38.2 (CH<sub>2</sub>), 28.3 (CH<sub>3</sub>), 19.3 (CH<sub>2</sub>). HRMS (ESI) calcd for C<sub>42</sub>H<sub>49</sub>FN<sub>3</sub>O<sub>7</sub> [M]<sup>+</sup> 726.3549, found 726.3565.

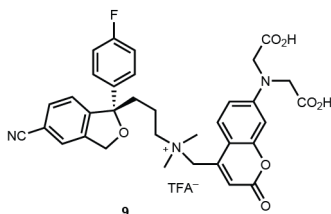

**PA-Esc (9):** This compound was prepared from **25** according to the general procedure described above for compound **6**. Method for reverse phase HPLC: 05–70% MeCN/H<sub>2</sub>O, linear gradient, with constant 0.1% v/v TFA additive. Yield: 80%, pale yellow powder. <sup>1</sup>H NMR (CD<sub>3</sub>OD, 400 MHz) δ 7.76 (d, *J* = 9.1 Hz, 1H), 7.67 (d, *J* = 7.0 Hz, 1H), 7.66 (s, 1H), 7.65 – 7.57 (m, 1H), 7.58 – 7.48 (m, 2H), 7.08 (t, *J* = 8.8 Hz, 2H), 6.73 (dd, *J* = 9.1, 2.6 Hz, 1H), 6.57 (d, *J* = 2.5 Hz, 1H), 6.31 (s, 1H), 5.25 – 5.05 (m, 2H), 4.59 (s, 2H), 4.32 (s, 4H), 3.58 – 3.41 (m, 2H), 3.09 (s, 3H), 3.04 (s, 3H), 2.40 – 2.33 (m, 1H), 2.18 – 2.11 (m, 1H), 1.94 – 1.68 (m, 2H). <sup>13</sup>C NMR (CD<sub>3</sub>OD, 101 MHz) δ 173.5 (C), 164.8 (C), 162.4 (C), 161.9 (C), 157.4 (C), 153.5 (C), 150.3 (C), 143.2 (C), 141.6 (C), 140.4 (2C), 133.2 (CH), 128.2 (CH), 128.1 (CH), 127.3 (CH), 126.8 (CH), 124.1 (CH), 119.5 (C), 118.3 (CH), 116.5 (CH), 116.3 (CH), 113.0 (C), 111.0 (CH), 110.6 (C), 100.2 (CH), 91.8 (C), 72.4 (CH<sub>2</sub>), 66.6 (CH<sub>2</sub>), 63.1 (CH<sub>2</sub>), 54.1 (CH<sub>2</sub>), 51.5 (CH<sub>3</sub>), 51.3 (CH<sub>3</sub>), 38.2 (CH<sub>2</sub>), 19.3 (CH<sub>2</sub>). HRMS (ESI) calcd for C<sub>34</sub>H<sub>33</sub>FN<sub>3</sub>O<sub>7</sub> [M]<sup>+</sup> 614.2297, found 614.2305.

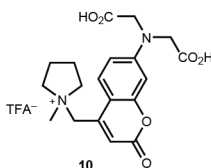

**Compound 10.** Coumarin bromide (**5**, 20 mg, 41.5 μmol) was dissolved in 3 mL anhydrous CH<sub>3</sub>CN. *N*-methylpiperidine (18 mg, 207 μmol) was added and the reaction mixture was heated to 60 °C and stirred for 30 min. The reaction mixture was then cooled to room temperature and concentrated *in vacuo*. This crude mixture was used directly in the TFA-mediated deprotection of *tert*-butyl group as described above for the compound **6** and purified by reverse phase HPLC (05–50% MeCN/H<sub>2</sub>O, linear gradient, with constant 0.1% v/v TFA additive). <sup>1</sup>H NMR (D<sub>2</sub>O, 400 MHz) δ 7.61 (d, *J* = 9.2 Hz, 1H), 6.60 (dd, *J* = 9.2, 2.6 Hz, 1H), 6.45 (d, *J* = 2.5 Hz, 1H), 6.25 (s, 1H), 4.60 (s, 2H), 4.00 (s, 4H), 3.65 – 3.53 (m, 4H), 2.98 (s, 3H), 2.26 – 2.16 (m, 4H). <sup>13</sup>C NMR (D<sub>2</sub>O+1 drop CH<sub>3</sub>OH, 101 MHz) δ 177.5 (C), 163.6 (C), 160.2 (C), 155.7 (C), 152.6 (C), 143.8 (C), 125.9 (CH), 113.9 (CH), 110.2 (CH), 108.4 (C), 97.9 (CH), 64.5 (CH<sub>2</sub>), 60.2 (CH<sub>2</sub>), 55.6 (CH<sub>2</sub>), 48.4 (CH<sub>3</sub>), 20.6 (CH<sub>2</sub>). HRMS (ESI) calcd for C<sub>19</sub>H<sub>23</sub>N<sub>2</sub>O<sub>6</sub> [M]<sup>+</sup> 375.1551, found 375.1567.

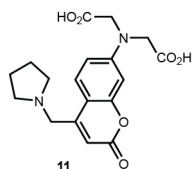

**Compound 11:** Coumarin bromide (**5**, 20 mg, 41.5  $\mu\text{mol}$ ) was dissolved in 3 mL anhydrous  $\text{CH}_3\text{CN}$ . Pyrrolidine (29.5 mg, 415  $\mu\text{mol}$ ) was added and the reaction mixture was heated to 60  $^\circ\text{C}$  and stirred for 30 min. The reaction mixture was then cooled to room temperature and concentrated *in vacuo*. This crude mixture was used directly in the TFA-mediated deprotection of *tert*-butyl group as described above for the compound **6** and purified by reverse phase HPLC (05–50% MeCN/ $\text{H}_2\text{O}$ , linear gradient, with constant 0.1% v/v TFA additive).  $^1\text{H}$  NMR ( $\text{D}_2\text{O}$ , 400 MHz)  $\delta$  7.68 (d,  $J = 9.1$  Hz, 1H), 6.76 (dd,  $J = 9.0, 2.6$  Hz, 1H), 6.67 (d,  $J = 2.6$  Hz, 1H), 6.40 (s, 1H), 4.63 (s, 2H), 4.38 (s, 4H), 3.75 (brs, 2H), 3.32 (brs, 2H), 2.23 (brs, 2H), 2.08 (brs, 2H).  $^{13}\text{C}$  NMR ( $\text{D}_2\text{O}$ , 101 MHz)  $\delta$  175.9 (C), 163.6 (C), 155.5 (C), 151.5 (C), 146.3 (C), 125.6 (CH), 111.5 (CH), 109.9 (CH), 108.3 (C), 98.8 (CH), 55.1 ( $\text{CH}_2$ ), 54.2 ( $\text{CH}_2$ ), 52.9 ( $\text{CH}_2$ ), 22.6 ( $\text{CH}_2$ ). HRMS (ESI) calcd for  $\text{C}_{18}\text{H}_{21}\text{N}_2\text{O}_6$   $[\text{M}+\text{H}]^+$  361.1394, found 361.1408.

### References

1. Hagen, V., Dekowski, B., Nache, V. et al., *Angew. Chem. Int. Ed.* **44**, 7887-7891 (2005).
2. Schoenleber, R.O. and Giese, B., *Synlett* **2003**, 501-504 (2003).
